# Supplementary material
Source: PubMed Central journal article supplement (PMC3605701)
Supplement: NIHMS52368-supplement-Supp_Fig_S1.pdf [file NIHMS52368-supplement-Supp_Fig_S1.pdf]

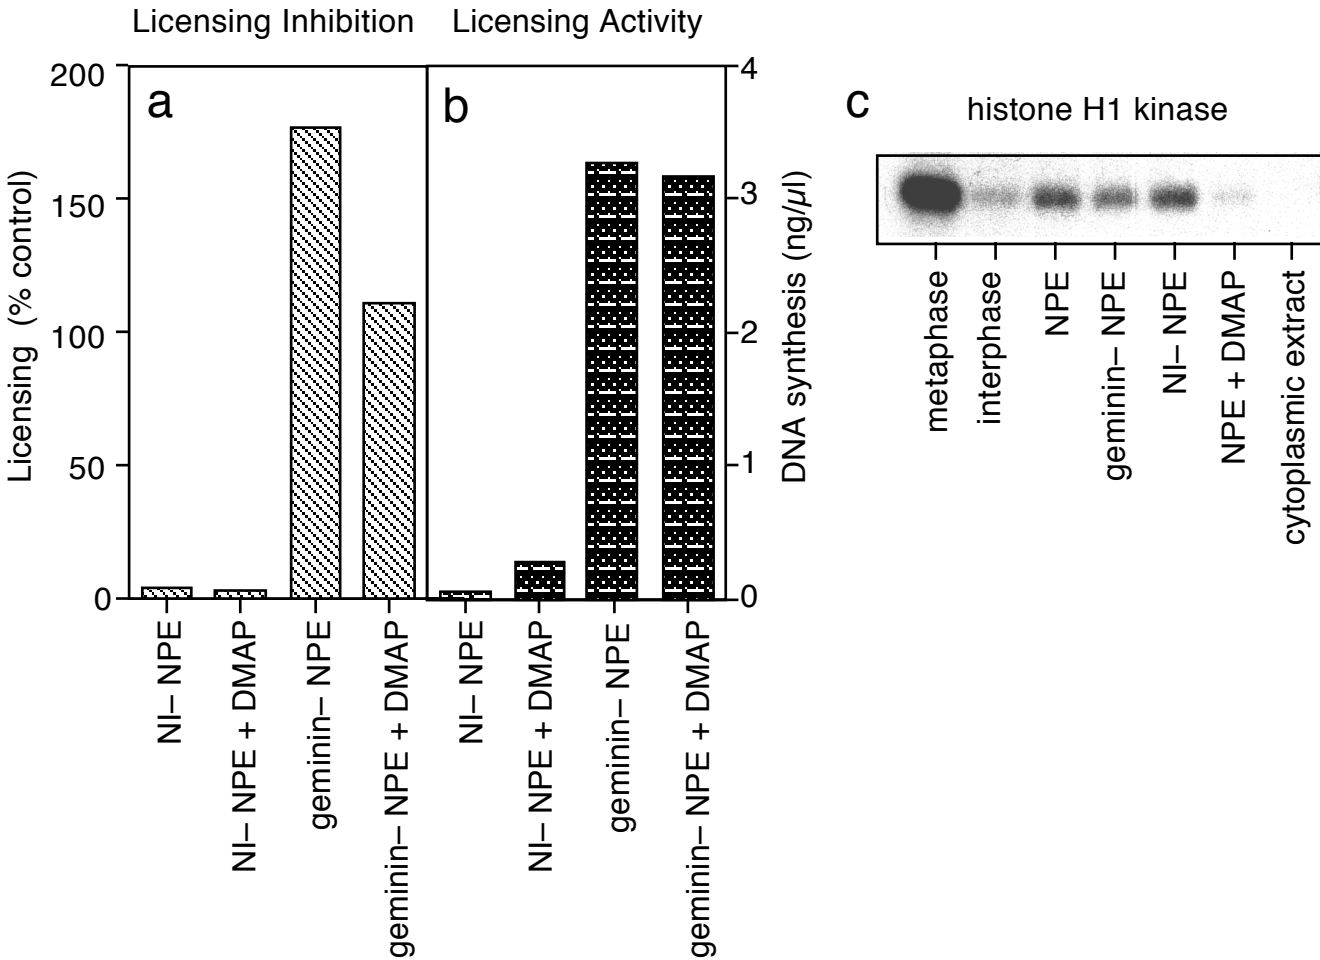

Supplementary data 1: Immunodepletion of geminin from nucleoplasmic extract, but not treatment with 6-DMAP, eliminates its ability to inhibit origin licensing.

Nucleoplasmic extract (NPE) was immunodepleted with antibodies to geminin or with non-immune antibodies, and was supplemented with or without 3 mM 6-DMAP.

a, Extracts assayed for the ability to inhibit licensing in untreated interphase extract.

b, Extracts assayed for their ability to license sperm nuclei.

c, Histone H1 kinase activity of extract. Metaphase-arrested, interphase and cytoplasmic extract are shown as comparison.
