# Supplementary material
Source: PubMed Central journal article supplement (PMC3605701)
Supplement: NIHMS52368-supplement-Supp_Fig_S2.pdf [file NIHMS52368-supplement-Supp_Fig_S2.pdf]

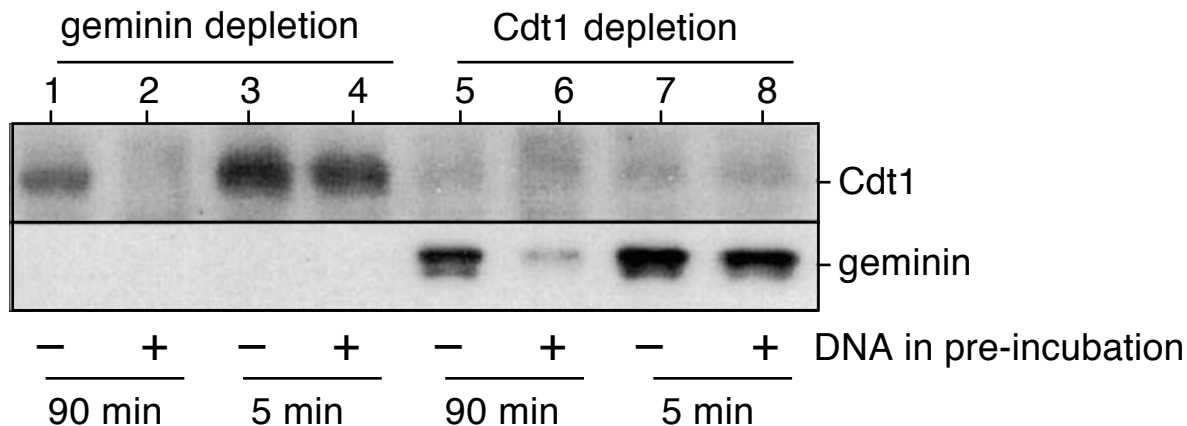

Supplementary data 2: Co-depletion of geminin and Cdt1/RLF-B only following nuclear assembly.

Interphase extract was incubated with (lanes 2, 4, 6, and 8) and without 10 ng DNA/ $\mu$ l (lanes 1, 3, 5 and 7) for the indicated times prior to immunodepletion with antibodies against geminin (lanes 1-4) or Cdt1 (lanes 5-8). 0.5 $\mu$ l of each extract was run on SDS-PAGE and immunoblotted for Cdt1 and geminin
